## SOCIAL-AFFECTIVE RESPONSES TO TRAUMA EXPOSURE

# 1            **Patterns of social-affective responses to trauma exposure and their** 2            **relation to psychopathology**

3            Sarah Thomas<sup>1</sup>, Judith Schäfer<sup>1</sup>, Philipp Kanske<sup>1,4</sup> & Sebastian Trautmann<sup>1,2,3</sup>

4            <sup>1</sup>Institute of Clinical Psychology and Psychotherapy, Faculty of Psychology, Technische  
5            Universität Dresden

6            <sup>2</sup>Department of Psychology, Faculty of Human Science, Medical School Hamburg

7            <sup>3</sup>ICPP Institute of Clinical Psychology and Psychotherapy, Medical School Hamburg

8            <sup>4</sup>Max Planck Institute for Human Cognitive and Brain Sciences, Leipzig, Germany

9

10          Correspondence should be addressed to: Sebastian Trautmann, Department of Psychology,

11          Faculty of Human Science, Medical School Hamburg, Am Kaiserakai 1, 20457 Hamburg,

12          Germany. E-mail: [sebastian.trautmann@medicalschooll-hamburg.de](mailto:sebastian.trautmann@medicalschooll-hamburg.de). Phone: ++49-40 361

13                                  226 49321; Fax: ++49-40 361 226 430.

14

15

## SOCIAL-AFFECTIVE RESPONSES TO TRAUMA EXPOSURE

### 16 **Abstract**

17 **Introduction:** Traumatic event exposure is an important risk factor for the  
18 development and maintenance of psychopathology. Social-affective responses to trauma  
19 exposure (e.g. shame, guilt, revenge, social alienation) could moderate this relationship, but  
20 little is known about their relevance for different types of psychopathology. Moreover, the  
21 interplay of different social-affective responses in predicting psychopathology is poorly  
22 understood. **Methods:** In a sample of  $N=1321$  trauma-exposed German soldiers, we  
23 examined cross-sectional associations of trauma-related social alienation, revenge, guilt and  
24 shame with both categorical (depressive disorder, alcohol use disorder, posttraumatic stress  
25 disorder) and dimensional (depression, anxiety) measures of psychopathology. Latent class  
26 analysis was conducted to identify possible patterns of trauma-related social-affective  
27 responses, and their relation to psychopathology. **Results:** All trauma-related social-affective  
28 responses predicted the presence of posttraumatic stress disorder, depressive disorder, alcohol  
29 use disorder and higher depressive and anxiety symptoms. Three latent classes were  
30 identified that fitted the data best, reflecting groups with (1) low, (2) moderate and (3) high  
31 risk for social-affective responses. The low-risk group demonstrated the lowest expressions  
32 on all psychopathology measures. Compared to the moderate-risk group, the high-risk group  
33 demonstrated no increased psychopathology. **Conclusions:** Trauma-related social alienation,  
34 shame, guilt, and revenge are characteristic of individuals with posttraumatic stress disorder,  
35 depressive disorder, alcohol use disorder, as well as with higher anxiety and depressive  
36 symptoms. There was little evidence for distinctive patterns of social-affective responses  
37 despite variation in the overall proneness to show trauma-related social-affective responses.  
38 Trauma-related social-affective responses could represent promising treatment targets which  
39 might be included in both cognitive and emotion-focused interventions.

## SOCIAL-AFFECTIVE RESPONSES TO TRAUMA EXPOSURE

### 40 **Introduction**

41 Exposure to traumatic events is an important risk factor for the development and  
42 maintenance of mental disorders (1). Apart from Posttraumatic Stress Disorder (PTSD),  
43 trauma exposure is particularly associated with the development of major depressive disorder  
44 and alcohol use disorder (AUD) (2). However, individuals vary considerably in their response  
45 to trauma exposure and the majority of individuals adjust well to the experience of severe  
46 stressful or traumatic events (3). Numerous factors have been suggested to moderate the  
47 association between trauma exposure and psychopathology (4). Social factors, which have  
48 received less attention so far, are among those variables that could have a decisive influence  
49 on mental health after trauma exposure (5). Relevant social factors include for instance  
50 perceived social support, disclosure and social acknowledgement (5).

51 Among social factors, social-affective responses to trauma exposure could be of  
52 particular importance. Following the socio-interpersonal model of PTSD by Maercker and  
53 Horn (6), social-affective responses to trauma exposure can be understood as complex mental  
54 states encompassing feelings, cognitions and motivations that relate to the social reality of an  
55 individual. Social-affective responses to traumatic events can include positive responses such  
56 as compassion (7) but can also include negative responses, such as shame, guilt, revenge and  
57 social alienation (6, 8). In line with the socio-interpersonal model of PTSD, most authors  
58 conceptualize guilt (9), revenge (10), shame and social alienation (8) as complex states that  
59 are relevant from both a cognitive and an emotion-based perspective of posttraumatic  
60 processing. Cognitive models of posttraumatic stress assume that dysfunctional trauma  
61 appraisals lead to negative cognitive schemas about the self and the world and produce a  
62 sense of ongoing threat accompanied by diminished self-efficacy (11, 12). In this context,  
63 trauma-related shame, guilt, and social alienation, for example, have been considered both as  
64 elements and consequences of negative cognitive schemas about the self and the world (11,

## SOCIAL-AFFECTIVE RESPONSES TO TRAUMA EXPOSURE

65 12). From an emotion-based perspective, shame and guilt, and in some interpretations also  
66 feelings of estrangement and vengefulness (6), are conceptualized as social emotions (13).  
67 Social emotions are regarded as “cognition-dependent” emotions that require mental  
68 representations of both oneself and others and work in the service of a social goal (14).  
69 Recent theories and empirical findings increasingly emphasize the importance of distressing  
70 social emotions as possible responses to trauma exposure (13). Importantly, negative trauma-  
71 related social-affective responses could be important for posttraumatic processing beyond  
72 general trauma-related emotional distress and negative cognitions. Social-affective responses  
73 such as shame, guilt, or social alienation may be particularly difficult to manage because they  
74 can threaten a person’s sense of self and social identity (15) and could seriously affect social  
75 relationships by preventing individuals from perceiving and using potential social resources  
76 such as social support or group membership (16). Moreover, there is evidence that social-  
77 affective responses such as shame keep individuals from seeking professional help (17).

78 In line with these assumptions, negative social-affective responses to trauma exposure  
79 have been associated with higher levels of psychopathology in previous studies (5). Trauma-  
80 related guilt and shame have been investigated most frequently and are associated with higher  
81 levels of PTSD symptoms (18, 19), with some authors suggesting a model of guilt and  
82 shame-based PTSD (15). Posttraumatic guilt and shame are highly interrelated, but it is  
83 assumed that the relationship between guilt and PTSD is more variable and less strong than  
84 the relationship between shame and PTSD (18, 19). Besides shame and guilt, trauma-related  
85 social alienation has shown to be an important mediator of the association between trauma  
86 exposure and PTSD symptoms (20). Trauma-related revenge phenomena have received less  
87 attention so far, although posttraumatic revenge feelings and cognitions have found to be  
88 predictive of higher severity and maintenance of PTSD symptoms (10, 21). To date, social-  
89 affective responses to trauma exposure have mainly been investigated with respect to PTSD.

## SOCIAL-AFFECTIVE RESPONSES TO TRAUMA EXPOSURE

90 However, there is also some evidence regarding other forms of posttraumatic  
91 psychopathology, such as depressive symptoms. Similar to PTSD, trauma-related shame (22)  
92 and guilt (22, 23) have been associated with higher levels of depressive symptoms. Like for  
93 PTSD, there is evidence that trauma-related social alienation mediates the association  
94 between traumatic event exposure and depressive symptoms (20). Moreover, posttraumatic  
95 guilt and shame have been related to increased alcohol use and might be associated with  
96 higher levels of anxiety symptoms (22, 24).

97       Taken together, negative social-affective responses to trauma exposure have been  
98 associated with higher levels of subsequent psychopathology. Previous studies have focused  
99 primarily on PTSD and less is known about associations with other psychopathologies such  
100 as depressive disorder (DD) and AUD. In addition, most studies have examined shame and  
101 guilt, while other possible social-affective responses have received less attention. Moreover,  
102 the interplay of different social-affective responses in predicting mental health has rarely  
103 been studied. Thus, little is known about whether there could be distinct patterns of different  
104 social-affective responses to trauma exposure and whether they relate differentially to  
105 psychopathology.

106       We therefore aimed to investigate associations of negative social-affective responses  
107 to trauma exposure (social alienation, revenge, guilt, shame) with mental disorders (DD,  
108 AUD and PTSD) as well as with dimensional measures of depression and anxiety in trauma-  
109 exposed individuals. We also aimed to investigate whether there are distinguishable patterns  
110 of trauma-related social-affective responses and, if so, how these patterns relate differentially  
111 to mental disorders and to dimensional symptom measures.

## SOCIAL-AFFECTIVE RESPONSES TO TRAUMA EXPOSURE

### 112 **Methods**

#### 113 **Participants and procedure**

114 Data were collected between 27.04.2010 and 10.12.2010 as part of the cross-sectional  
115 component of a larger study program (25) investigating mental health and its determinants in  
116 German military personnel. A comprehensive description of the entire study design can be  
117 found elsewhere (25). A total of  $N = 2372$  German soldiers were included in the original  
118 study. For the purpose of the present analysis, only participants who had been exposed to at  
119 least one lifetime traumatic event according to the DSM-IV A1 criterion were included ( $N =$   
120 1636). Since the low proportion of females in the German military would not have permitted  
121 adequate subgroup analysis, female soldiers ( $n = 104$ ) were excluded in the present analysis.  
122 Moreover, participants who had any missing values on the items measuring shame ( $n = 207$ ),  
123 guilt ( $n = 206$ ), revenge ( $n = 206$ ) and social alienation ( $n = 204$ ) were excluded. This  
124 resulted in an analysis sample of  $N = 1321$  individuals. To ensure that there was no selective  
125 non-response in the sense that more distressed individuals did not respond to the items, we  
126 examined whether the excluded participants ( $N = 211$ ) and the analysis sample ( $N = 1321$ )  
127 differed with respect to the outcomes examined. There were no differences regarding the  
128 severity of depressive and anxiety symptoms and regarding the percentage of PTSD and  
129 AUD, but excluded individuals had a lower percentage of DD than included individuals  
130 (Table S1).

131 Participation in the study was voluntary and confidential. Trained clinical  
132 psychologists completed informed consent procedures and conducted the assessments.  
133 Informed written consent was obtained from all participants. Assessments comprised a  
134 standardized diagnostic interview with supplementary questionnaires to allow for the  
135 collection of additional information, such as dimensional symptom severity and demographic

## SOCIAL-AFFECTIVE RESPONSES TO TRAUMA EXPOSURE

136 data. The study was approved by the Ethics Board of Technische Universität Dresden (EK  
137 72022010).

### 138 **Measures**

139 **Social-affective responses to trauma exposure.** Social-affective responses to trauma  
140 exposure (shame, guilt, revenge, social alienation) were measured with items adapted from  
141 the a priori item pool of the Posttraumatic Cognitions Inventory (PTCI) that were of interest  
142 to the present research question (11, 26). Social-affective responses (past four weeks) were  
143 assessed with respect to the worst traumatic event. Items were rated on a 5-point scale  
144 (“Strongly disagree”, “rather disagree”, “neutral”, “rather agree”, “strongly agree”). Since  
145 several response categories had too low counts to treat the variables as dimensional, they  
146 were operationalized as dichotomous variables (present vs. not present). As shown in the  
147 online supplement (Table S2) only a very small percentage of participants agreed to the  
148 items. Given the male military sample, it is possible that emotional and potentially  
149 stigmatizing constructs such as shame, guilt, revenge, and social alienation were  
150 underreported (27). Therefore, the middle response (“neutral”), which can be conceptualized  
151 as transition point between disagreement and agreement in Likert-type scales, was chosen as  
152 a cut-off for the presence of the respective social-affective response.

153 Guilt was defined as feelings and thoughts about having violated personal norms of  
154 right and wrong and being responsible for this wrongdoing (i.e. perceived lack of a  
155 justification for one's actions) (15). Guilt was assessed with the item “The way I thought/felt  
156 and behaved during the event is unforgivable”. Shame (external) relates to the experience of a  
157 negative social presentation and is characterized by feelings and thoughts of being devalued  
158 in the eyes of others and being looked down upon (15). We decided to focus on external  
159 shame, since external shame has shown tighter links to psychopathology than internal shame  
160 (28) and could be easier to distinguish from guilt, as both guilt and internal shame refer to a

## SOCIAL-AFFECTIVE RESPONSES TO TRAUMA EXPOSURE

161 negative self-evaluation, whereas external shame refers to the perception of being negatively  
162 evaluated by others (15). External shame was assessed with two items to be able to consider  
163 shame as a response to the actual presence of others during the traumatic event (“I  
164 embarrassed myself during the event”) and as a response to the theoretical presence and  
165 judgment of others (“If people knew what happened, they would look down on me”).  
166 External shame was rated as present if participants responded with at least neutral to either of  
167 the two items. We defined revenge as the motivation to retaliate that results from feelings and  
168 thoughts of having been hurt wrongfully (29). Revenge was rated as present if the item “I  
169 want to punish the people who did this to me” was not negated. Social alienation was defined  
170 as feelings and thoughts of being disconnected from others (30). Social alienation was also  
171 measured with two items to consider both alienation in close relationships (“I will never be  
172 able to be close to other people again”) as well as more generalized appraisals of  
173 disconnectedness (“Other people do not understand me”). Social alienation was classified as  
174 present if participants responded with at least neutral to either of these items. For shame  
175 (0.94) and social alienation (0.95), tetrachoric correlations between the items were high  
176 enough to allow the combination of the items into one construct.

177 **12-month mental disorders.** The prevalence of a DSM-IV diagnosis of DD, PTSD or  
178 AUD in the past 12 months was assessed using the military version of the Munich-Composite  
179 International Diagnostic Interview (DIA-X/M-CIDI (31)). The DIA-X/M-CIDI is a fully-  
180 standardized interview that allows a reliable (32) and valid (33) assessment of mental  
181 disorders for lifetime and in the past 12 months according to DSM-IV-TR diagnostic criteria.  
182 DD was defined as the presence of either major DD or dysthymia in the past 12 months.  
183 AUD included those individuals who had met the criteria of either alcohol abuse or alcohol  
184 dependence in the past 12 months.



## SOCIAL-AFFECTIVE RESPONSES TO TRAUMA EXPOSURE

185           **Anxiety and depressive symptoms.** Since it was deemed important to consider  
186 dimensional measures of psychopathology in addition to the categorical assessment of mental  
187 disorders (34), current anxiety and depressive symptoms (past seven days) were assessed  
188 with the German version of the Hospital Anxiety and DD Scale (HADS-D) (35). The anxiety  
189 and the depression scale of the HADS-D each consist of seven items that are rated on a four-  
190 point scale. The response scales are anchored differently for each item and measure either the  
191 frequency or severity of symptoms or the severity of behavioral changes. A total sum score  
192 was calculated for anxiety symptoms (theoretical range 0-21) and for depressive symptoms  
193 (theoretical range 0-21). In the present sample, internal consistency was  $\alpha = 0.75$  for the  
194 anxiety scale and  $\alpha = 0.77$  for the depression scale.

### 195 **Data analysis**

196           All analyses were performed with Stata 15.1 (36). First, logistic regressions were  
197 calculated to examine whether and how strongly each individual social-affective response  
198 (shame, guilt, revenge and social alienation) predicted the presence of DD, PTSD and AUD,  
199 respectively. In order to better assess the specificity of the individual associations, for each  
200 logistic regression, an additional model was calculated, adjusting for the respective comorbid  
201 disorders of DD, PTSD or AUD. Second, to complement the analyses by dimensional  
202 symptom measures, linear regressions were performed to examine individual associations of  
203 shame, guilt, revenge and social alienation with depressive and anxiety symptoms. Again,  
204 models were re-calculated adjusting for anxiety symptoms in models with depressive  
205 symptoms as dependent variable, and vice versa.

206           Subsequently, Latent Class Analysis was performed to identify potential latent classes  
207 of patterns of social-affective responses. The number of classes was determined using the  
208 Bayesian Information Criteria and Akaike Information Criteria. In a second step, subjects  
209 were assigned to a given class based on their posterior class membership probabilities. To

## SOCIAL-AFFECTIVE RESPONSES TO TRAUMA EXPOSURE

210 examine whether patterns of social-affective responses were predictive of categorical and/or  
211 dimensional measures of psychopathology, logistic and linear regressions were calculated  
212 with mental disorders and dimensional symptom measures as dependent and assigned class  
213 membership as predictor variable. Models were re-calculated adjusting for anxiety symptoms  
214 in models with depressive symptoms as dependent variable, and vice versa. Associations with  
215 diagnosis of PTSD, AUD or DD as dependent variable were adjusted for the respective  
216 comorbid disorders (PTSD, AUD, DD).

### 217 **Results**

#### 218 **Sample characteristics**

219 Participants were male and had a mean age of 28.8 years ( $SD = 7.6$ ). The mean  
220 number of experienced traumatic events was 2.6 ( $SD = 1.9$ ). There were 32.0% of  
221 participants who had children and 27.8% were married. Among the participants, 18.8% had a  
222 low educational level (9<sup>th</sup> grade), 63.2% had a middle (10<sup>th</sup> grade) educational level and  
223 18.0% had a high (high school or higher) educational level. Of the participants, 1.7% rated  
224 their economic situation as “bad” or “very bad”, 19.8% rated their economic situation to be at  
225 least sufficient and 78.5% rated their economic situation as “good” or “very good”. Among  
226 the participants. Tetrachoric correlations between shame, guilt, social alienation and revenge  
227 are presented in Table 1. High correlations were found between all social-affective responses  
228 with the strongest correlation being between guilt and shame ( $Rho = 0.88$ ). The frequency of  
229 the presence of revenge, social alienation, shame and guilt in the total sample and among  
230 individuals meeting criteria for PTSD, DD or AUD is shown in Table 2.

231

#### 232 **Table 1**

233 *Tetrachoric correlations between social-affective responses to trauma exposure*

---

| Social alienation | Revenge | Shame | Guilt |
|-------------------|---------|-------|-------|
|-------------------|---------|-------|-------|

---

## SOCIAL-AFFECTIVE RESPONSES TO TRAUMA EXPOSURE

|                   |         |         |         |   |
|-------------------|---------|---------|---------|---|
| Social alienation | 1       |         |         |   |
| Revenge           | 0.77*** | 1       |         |   |
| Shame             | 0.83*** | 0.84*** | 1       |   |
| Guilt             | 0.82*** | 0.80*** | 0.88*** | 1 |

234 \*\*\*  $p < .001$

235

### 236 **Table 2**

237 *Frequency of social alienation, revenge, shame and guilt in individuals with a 12-month*  
 238 *diagnosis of PTSD, DD and AUD*

|                   | Total sample<br><i>N</i> =1321 | DD<br><i>N</i> =53 | PTSD<br><i>N</i> =54 | AUD<br><i>N</i> =66 |
|-------------------|--------------------------------|--------------------|----------------------|---------------------|
|                   | <i>n</i> (%)                   | <i>n</i> (%)       | <i>n</i> (%)         | <i>n</i> (%)        |
| Social alienation | 233 (17.6%)                    | 24 (45.3%)         | 29 (53.7%)           | 20 (30.3%)          |
| Revenge           | 231 (17.5%)                    | 15 (28.3%)         | 23 (42.6%)           | 25 (37.9%)          |
| Shame             | 155 (11.7%)                    | 14 (26.4%)         | 18 (33.3%)           | 16 (24.2%)          |
| Guilt             | 149 (11.3%)                    | 15 (28.3%)         | 12 (22.2%)           | 14 (21.2%)          |

239 *Note.* DD = Depressive disorder. PTSD = Posttraumatic Stress Disorder. AUD = Alcohol  
 240 Use Disorder.

241

### 242 **Association of social-affective responses with mental disorders and with dimensional** 243 **symptom measures (anxiety and depression)**

244 Table 3 shows the associations of shame, guilt, revenge and social alienation with  
 245 DD, PTSD and AUD. All associations were statistically significant. The strongest  
 246 associations existed with respect to PTSD and with respect to social alienation. The highest  
 247 ORs were observed for associations between social alienation and PTSD ( $OR = 6.04$ , 95%  
 248  $CI = [3.47, 10.53]$ ,  $p < .001$ ) and between social alienation and DD ( $OR = 4.19$ , 95%  $CI$   
 249  $= [2.39, 7.35]$ ,  $p < .001$ ). High ORs were also found for the association between shame and  
 250 PTSD ( $OR = 4.12$ , 95%  $CI = [2.28, 7.46]$ ,  $p < .001$ ), revenge and PTSD ( $OR = 3.78$ , 95%  $CI$

## SOCIAL-AFFECTIVE RESPONSES TO TRAUMA EXPOSURE

251 = [2.16, 6.61],  $p < .001$ ), and between guilt and DD ( $OR = 3.34$ , 95% CI = [1.79, 6.23],  
 252  $p < .001$ ). All associations were reduced when adjusted for comorbid disorders (Table 3) and  
 253 there were no statistically significant associations any more between revenge and DD and  
 254 guilt and PTSD.

255

### 256 **Table 3**

257 *Associations of shame, guilt, revenge and social alienation with DD, PTSD and AUD*

|                          | DD        |          |              | PTSD      |          |               | AUD       |          |              |
|--------------------------|-----------|----------|--------------|-----------|----------|---------------|-----------|----------|--------------|
|                          | <i>OR</i> | <i>p</i> | 95%CI        | <i>OR</i> | <i>p</i> | 95%CI         | <i>OR</i> | <i>p</i> | 95%CI        |
| <b>Social alienation</b> |           |          |              |           |          |               |           |          |              |
| Unadjusted model         | 4.19      | < .001   | [2.39, 7.35] | 6.04      | < .001   | [3.47, 10.53] | 2.13      | .007     | [1.23, 3.67] |
| Adjusted model           | 3.31      | < .001   | [1.83, 5.98] | 5.06      | < .001   | [2.86, 8.96]  | 1.80      | .044     | [1.01, 3.21] |
| <b>Revenge</b>           |           |          |              |           |          |               |           |          |              |
| Unadjusted model         | 1.92      | .037     | [1.04, 3.56] | 3.78      | < .001   | [2.16, 6.61]  | 3.11      | < .001   | [1.85, 5.22] |
| Adjusted model           | 1.45      | .269     | [0.75, 2.78] | 3.33      | < .001   | [1.87, 5.93]  | 2.85      | < .001   | [1.68, 4.83] |
| <b>Shame</b>             |           |          |              |           |          |               |           |          |              |
| Unadjusted model         | 2.87      | .001     | [1.52, 5.42] | 4.12      | < .001   | [2.28, 7.46]  | 2.57      | .002     | [1.42, 4.63] |
| Adjusted model           | 2.20      | .021     | [1.13, 4.30] | 3.46      | < .001   | [1.88, 6.39]  | 2.25      | .009     | [1.22, 4.13] |
| <b>Guilt</b>             |           |          |              |           |          |               |           |          |              |
| Unadjusted model         | 3.34      | < .001   | [1.79, 6.23] | 2.36      | .012     | [1.21, 4.59]  | 2.23      | .011     | [1.21, 4.14] |
| Adjusted model           | 2.90      | .001     | [1.52, 5.52] | 1.82      | .094     | [0.90, 3.66]  | 1.99      | .033     | [1.06, 3.75] |

258 *Note.* DD = Depressive disorder. PTSD = Posttraumatic Stress Disorder. AUD = Alcohol  
 259 Use Disorder. Adjusted model: adjusted for the respective comorbid disorders of DD, PTSD  
 260 or AUD.

261

262 Table 4 displays the associations between shame, guilt, revenge and social alienation  
 263 and anxiety and depressive symptoms. All associations were statistically significantly. As for  
 264 associations with mental disorders, the highest associations were observed with regard to

## SOCIAL-AFFECTIVE RESPONSES TO TRAUMA EXPOSURE

265 social alienation. Social alienation predicted higher anxiety ( $\beta = 2.02$ , 95% CI = [1.64, 2.40]),  
 266  $p < .001$ ) as well as higher depressive symptoms ( $\beta = 1.84$ , 95% CI = [1.46, 2.21],  $p < .001$ ).  
 267 A strong association was also found between shame and depressive symptoms ( $\beta = 1.60$ , 95%  
 268 CI = [1.15, 2.05],  $p < .001$ ). All associations were reduced when adjusted for anxiety and  
 269 depressive symptoms, respectively (Table 4). The association between guilt and depressive  
 270 symptoms was not statistically significant any more when adjusted for anxiety symptoms.  
 271 When adjusted for depressive symptoms, there was no longer a significant association  
 272 between shame and anxiety symptoms.

273

### 274 **Table 4**

275 *Associations of shame, guilt, revenge and social alienation with depressive and anxiety*  
 276 *symptoms*

|                          | Depressive Symptoms |        |               | Anxiety Symptoms |        |               |
|--------------------------|---------------------|--------|---------------|------------------|--------|---------------|
|                          | $\beta$             | $p$    | 95%CI         | $\beta$          | $p$    | 95%CI         |
| <b>Social alienation</b> |                     |        |               |                  |        |               |
| Unadjusted model         | 1.84                | < .001 | [1.46, 2.21]  | 2.02             | < .001 | [1.64, 2.40]  |
| Adjusted model           | 0.59                | < .001 | [0.28, 0.89]  | 0.86             | < .001 | [0.55, 1.16]  |
| <b>Revenge</b>           |                     |        |               |                  |        |               |
| Unadjusted model         | 1.09                | < .001 | [0.70, 1.47]  | 1.10             | < .001 | [0.71, 1.49]  |
| Adjusted model           | 0.39                | .010   | [0.09, 0.69]  | 0.39             | .012   | [0.09, 0.69]  |
| <b>Shame</b>             |                     |        |               |                  |        |               |
| Unadjusted model         | 1.60                | < .001 | [1.15, 2.05]  | 1.33             | < .001 | [0.87, 1.79]  |
| Adjusted model           | 0.77                | < .001 | [0.42, 1.12]  | 0.27             | .135   | [-0.09, 0.64] |
| <b>Guilt</b>             |                     |        |               |                  |        |               |
| Unadjusted model         | 1.08                | < .001 | [0.62, 1.54]  | 1.35             | < .001 | [0.88, 1.82]  |
| Adjusted model           | 0.22                | .234   | [-0.14, 0.58] | 0.65             | < .001 | [0.29, 1.01]  |

277 *Note.* PTSD = Posttraumatic Stress Disorder. AUD = Alcohol Use Disorder. Adjusted model:  
 278 adjusted for depressive symptoms respectively anxiety symptoms.

## SOCIAL-AFFECTIVE RESPONSES TO TRAUMA EXPOSURE

279

### 280 **Latent class analysis**

281 The fit statistics for different class solutions are displayed in Table 5. The model that  
282 fitted the data best was the one assuming three underlying classes of patterns of social-  
283 affective responses. The three classes model did not differ from a saturated model ( $\chi^2(1) =$   
284  $2.036, p = 0.154$ ). The frequencies of shame, guilt, social alienation and revenge within each  
285 of the three latent classes of social-affective responses are shown in Figure 1. The majority of  
286 individuals (79.2%) were assigned to a *low-risk group* for social affective-responses, 180  
287 participants (13.6%) were assigned a *moderate-risk group* for social affective-responses and  
288 95 participants (7.2%) to a *high-risk group* for social-affective responses. The low-risk group  
289 was characterized by no or very low frequencies of social-affective responses. Individuals in  
290 this group reported no shame and no social alienation, and only 6.7% of individuals reported  
291 revenge and 2.2% reported guilt. In the high-risk group, all individuals confirmed the  
292 presence of shame, guilt and revenge and 92.6% confirmed the presence of social alienation.  
293 In the moderate-risk group the percentage of individuals reporting guilt (17.2%), shame  
294 (33.3%) and revenge (36.7%) was rather low, but a majority (80.6%) reported social  
295 alienation.

296 -Figure 1: Percentage of individuals reporting the presence of guilt, shame, revenge and  
297 social alienation within each latent class of social-affective responses-

### 298 **Table 5**

#### 299 *Results of Latent Class Analysis*

| Model         | AIC      | BIC      |
|---------------|----------|----------|
| One class     | 4349.548 | 4370.293 |
| Two classes   | 3278.232 | 3324.908 |
| Three classes | 3231.407 | 3304.013 |
| Four classes  | 3235.372 | 3323.536 |

## SOCIAL-AFFECTIVE RESPONSES TO TRAUMA EXPOSURE

300 *Note.* AIC = Akaike's information criterion. BIC = Bayesian information criterion.

### 301 **Associations of class membership with mental disorders and with dimensional symptom** 302 **measures (anxiety and depression)**

303 Percentages of DD, PTSD, and AUD within the three latent classes are shown in  
304 Table 6. Descriptively, the highest percentage of PTSD (13.9%) and DD (11.1%) was in the  
305 moderate-risk group for social-affective responses, followed by the high-risk group (PTSD:  
306 6.3%, DD: 6.3%) and the low-risk group for social-affective responses (PTSD: 2.2%, DD:  
307 2.6%). In line with this, when compared to the low-risk group, the moderate-risk and the  
308 high-risk group for social-affective responses had a higher risk for PTSD (Moderate vs. Low:  
309  $OR = 7.17$ , 95% CI = [3.97, 12.95],  $p < .001$ ; High vs. Low:  $OR = 3.00$ , 95% CI = [1.19,  
310 7.56],  $p = .020$ ) and for DD (Moderate vs. Low:  $OR = 4.72$ , 95% CI = [2.58, 8.61],  $p < .001$ ;  
311 High vs. Low:  $OR = 2.54$ , 95% CI = [1.02, 6.33],  $p = .044$ ). There were no statistical  
312 differences between the moderate-risk and the high-risk group in the percentage of PTSD and  
313 DD (Table 6).

314

### 315 **Table 6**

316 *Percentage of DD, PTSD and AUD within each latent class of social-affective responses and*  
317 *associations between latent class membership and diagnoses*

|                     | Low-risk<br>( $N=1046$ ) | Moderate-<br>risk<br>( $N=180$ ) | High-risk<br>( $N=95$ ) | Moderate-risk vs.<br>Low-risk | High-risk vs.<br>Low-risk | High-risk vs.<br>Moderate-risk |
|---------------------|--------------------------|----------------------------------|-------------------------|-------------------------------|---------------------------|--------------------------------|
|                     | %                        | %                                | %                       | OR (95%CI)                    | OR (95%CI)                | OR (95%CI)                     |
| <b>DD</b>           | 2.6                      | 11.1                             | 6.3                     |                               |                           |                                |
| Unadjusted<br>model |                          |                                  |                         | 4.72***(2.58, 8.61)           | 2.54*(1.02, 6.33)         | 0.54(0.21, 1.39)               |
| Adjusted<br>model   |                          |                                  |                         | 3.62***(1.91, 6.86)           | 2.24(0.89, 5.64)          | 0.62(0.23, 1.63)               |
| <b>PTSD</b>         | 2.2                      | 13.9                             | 6.3                     |                               |                           |                                |
| Unadjusted<br>model |                          |                                  |                         | 7.17***(3.97, 12.95)          | 3.00*(1.19, 7.56)         | 0.42(0.17, 1.06)               |

## SOCIAL-AFFECTIVE RESPONSES TO TRAUMA EXPOSURE

|                  |     |     |     |                      |                   |                  |
|------------------|-----|-----|-----|----------------------|-------------------|------------------|
| Adjusted model   |     |     |     | 5.92***(3.22, 10.88) | 2.62*(1.02, 6.69) | 0.44(0.17, 1.14) |
| <b>AUD</b>       | 3.9 | 8.9 | 9.5 |                      |                   |                  |
| Unadjusted model |     |     |     | 2.39*(1.31, 4.36)    | 2.57*(1.21, 5.45) | 1.07(0.46, 2.53) |
| Adjusted model   |     |     |     | 2.01*(1.07, 3.79)    | 2.39*(1.12, 5.12) | 1.19(0.50, 2.83) |

318 *Note.* DD = Depressive disorder. PTSD = Posttraumatic Stress Disorder. AUD = Alcohol  
 319 Use Disorder. Adjusted model: adjusted for the respective comorbid disorders of DD, PTSD  
 320 or AUD.

321 \*  $p < .05$

322 \*\*  $p < .01$

323 \*\*\*  $p < .001$

324

325 With regard to the percentage of AUD, a slightly different pattern emerged:

326 descriptively, the high-risk group for social-affective responses had the highest percentage of

327 AUD (9.5%), followed by the moderate-risk group (8.9%) and the low-risk group (3.9%). In

328 line with this, the high-risk group ( $OR = 2.57$ , 95% CI = [1.21, 5.45],  $p = .014$ ) and the

329 moderate-risk group for social-affective responses ( $OR = 2.39$ , 95% CI = [1.31, 4.36],

330  $p = .004$ ) had a higher risk for AUD than the low-risk group. The high-risk group and the

331 moderate-risk group did not differ from each other with respect to the percentage of AUD

332 (Table 6). Adjusting for comorbid disorders did not considerably change the described

333 pattern of results (Table 6).

334 Dimensional measures of anxiety and depressive symptoms for each latent class of

335 social-affective responses are presented in Table 7. Similar to what was found for DD and for

336 PTSD, the moderate-risk group descriptively had the highest mean values for depressive

337 symptoms ( $M = 3.9$ ) and for anxiety symptoms ( $M = 4.8$ ), followed by the high-risk group

338 and the low-risk group (Table 7). In accordance with this, the moderate-risk group ( $\beta = 2.09$ ,

339 95% CI = [1.67, 2.52],  $p < .001$ ) and the high-risk group ( $\beta = 1.36$ , 95% CI = [0.80, 1.93],  $p <$



## SOCIAL-AFFECTIVE RESPONSES TO TRAUMA EXPOSURE

340 .001) had higher anxiety symptoms than the low-risk group for social-affective responses.

341 Moreover, the high-risk group for social-affective responses had lower anxiety symptoms

342 than the moderate-risk group ( $\beta = -0.73$ , 95% CI = [-1.40, -0.06],  $p = .032$ ).

### 343 **Table 7**

344 *Dimensional symptom measures of anxiety and depression in each latent class of social-*  
 345 *affective responses and associations between latent class membership and dimensional*  
 346 *symptom measures*

|                            | Low-risk<br>(N=1046) | Moderate-risk<br>(N=180) | High-risk<br>(N=95) | Moderate-risk vs.<br>Low-risk | High-risk vs.<br>Low-risk | High-risk vs.<br>Moderate-risk |
|----------------------------|----------------------|--------------------------|---------------------|-------------------------------|---------------------------|--------------------------------|
|                            | <i>M (SD)</i>        | <i>M (SD)</i>            | <i>M (SD)</i>       | $\beta$ (95%CI)               | $\beta$ (95%CI)           | $\beta$ (95% CI)               |
| <b>Depressive symptoms</b> | 1.9<br>(2.4)         | 3.9<br>(3.3)             | 3.4<br>(3.4)        |                               |                           |                                |
| Unadjusted model           |                      |                          |                     | 1.97***(1.55, 2.38)           | 1.51***(0.95, 2.06)       | -0.46(-1.11, 0.20)             |
| Adjusted model             |                      |                          |                     | 0.68***(0.34, 1.02)           | 0.67**(0.23, 1.11)        | -0.01(-0.52, 0.50)             |
| <b>Anxiety symptoms</b>    | 2.7<br>(2.5)         | 4.8<br>(3.3)             | 4.1<br>(3.5)        |                               |                           |                                |
| Unadjusted model           |                      |                          |                     | 2.09***(1.67, 2.52)           | 1.36***(0.80, 1.93)       | -0.73*(-1.40, -0.06)           |
| Adjusted model             |                      |                          |                     | 0.84***(0.50, 1.19)           | 0.40(-0.04, 0.85)         | -0.44(-0.96, 0.08)             |

347 *Note.* *M* = Mean value. *SD* = Standard Deviation. Adjusted model: adjusted for depressive  
 348 symptoms respectively anxiety symptoms.

349 \*  $p < .05$

350 \*\*  $p < .01$

351 \*\*  $p < .001$

352

353 The moderate-risk group ( $\beta = 1.97$ , 95% CI = [1.55, 2.38],  $p < .001$ ) and the high-risk

354 group ( $\beta = 1.51$ , 95% CI = [0.95, 2.06],  $p < .001$ ) also had higher depressive symptoms than

355 the low-risk group. The moderate-risk and the high-risk group did not differ with respect to

356 the magnitude of depressive symptoms (Table 7).



## SOCIAL-AFFECTIVE RESPONSES TO TRAUMA EXPOSURE

382 unlikely that the association was attributable to this overlap alone, as trauma-related social  
383 alienation also most strongly predicted DD, anxiety symptoms and depressive symptoms.  
384 Trauma-related social alienation could contribute to psychopathology as it could interfere  
385 with an individual's sense of identity, foster insecure attachment styles and associated  
386 emotional distress (20, 37) and lead to a reduced capacity to benefit from potential social  
387 resources (16). However, a relationship in the opposite causal direction seems also  
388 conceivable, since individuals with a psychopathology of depression, anxiety or  
389 posttraumatic stress often suffer from diminished interest or pleasure, demonstrate avoidance  
390 behavior and experience stigma, which could all lead to social withdrawal and promote  
391 feelings and cognitions of social alienation. This could result in a vicious cycle in which  
392 social alienation fosters psychopathology and higher psychopathology in turn reinforces  
393 social alienation.

394 Besides social alienation, shame was the strongest predictor of PTSD, whereas guilt  
395 was the weakest predictor of PTSD. This is in line with previous studies demonstrating that  
396 shame is more strongly related to PTSD than guilt (18, 19). Shame might be more aversive  
397 than guilt, because it does not only refer to one's perceived misbehavior in a specific situation  
398 (e.g. "I did something bad"), but to more global negative self-appraisals (e.g. "I am bad ") as  
399 well as to the perception of being devalued in the eyes of others (19). In the present study,  
400 trauma-related guilt appeared to be of particular relevance for DD, which may be partly due  
401 to the fact that excessive or inappropriate guilt is a potential symptom of major depressive  
402 disorder. Revenge was the strongest predictor of AUD. Contrary to shame and guilt, revenge  
403 has received very little attention as a social-affective response to trauma exposure, although  
404 interpersonal aggression is common among trauma survivors (5). Our findings highlight the  
405 importance of identifying not only self-critical responses to trauma exposure (e.g., shame,  
406 guilt) but also hostile reactions towards others.

## SOCIAL-AFFECTIVE RESPONSES TO TRAUMA EXPOSURE

407 Besides investigating individual associations between social-affective responses and  
408 psychopathology, the second aim of this study was to examine patterns of social-affective  
409 responses and their relation to psychopathology. Three latent classes were identified that  
410 fitted the data best reflecting groups with low, moderate and high risk for negative social-  
411 affective responses. The found classes seem to primarily reflect the overall proneness to  
412 experience negative social-affective responses. There appear to be few systematic patterns of  
413 social-affective responses with a high risk for one social-affective response and a low risk for  
414 other social-affective responses. Therefore, individuals who are more prone to self-critical  
415 social-affective responses (e.g. guilt, shame) also seem to be more prone to report hostile  
416 reactions (e.g. revenge) and to report social alienation. This is consistent, for example, with  
417 theories assuming that shame can result in externalization of blame and anger towards others  
418 as well as in social withdrawal (15). It is also in line with theories suggesting that feelings  
419 and cognitions of revenge often activate shame and guilt (39).

420 In the present study, one exception was that in the moderate-risk group, social  
421 alienation was reported with high likelihood, whereas the risk of reporting other social-  
422 affective reactions was considerably smaller. After trauma exposure, the threshold to  
423 experience social alienation might therefore be relatively low. One might also speculate that  
424 reporting social alienation is less stigmatized than reporting revenge, guilt, or shame.

425 As could be expected, the low-risk group for social-affective responses had the lowest  
426 risk for PTSD, AUD and DD and the lowest levels of depressive and anxiety symptoms. A  
427 more surprising finding was that the high-risk group did not show higher levels of  
428 psychopathology than the moderate-risk group for social-affective responses. In contrary, the  
429 high-risk group even had lower anxiety symptoms than the moderate-risk group. A possible  
430 explanation could be that the moderate-risk and the high-risk group differed not only in terms  
431 of the likelihood with which individuals in these groups reported social-affective responses,

## SOCIAL-AFFECTIVE RESPONSES TO TRAUMA EXPOSURE

432 but also in the way they coped with distressing feelings and thoughts. It is conceivable that  
433 some individuals in the moderate-risk group relied more heavily on avoidant coping  
434 strategies (e.g. rumination, experiential avoidance, thought suppression) to down-regulate the  
435 experience of negative social-affective responses. Such avoidant strategies, however, are  
436 related to higher levels of internalizing and distress-related psychopathology, such as  
437 symptoms of PTSD, depression and anxiety (40, 41). Another explanation could be that, in  
438 the present study, social alienation was particularly relevant for psychopathology, and  
439 individuals in the moderate-risk and in the high-risk group differed little in the likelihood  
440 with which they reported social alienation. Taken together, it appears necessary to consider  
441 not only the mere presence of social-affective responses but also their regulation and other  
442 potentially relevant moderating factors to understand the relationship between social-  
443 affective responses and psychopathology.

444 This study has several limitations. (1) We examined a relatively healthy sample with  
445 an average low frequency of self-reported negative social-affective responses and low levels  
446 of psychopathology. This is a limitation in three regards. First, it reduces the variance in the  
447 variables under investigation, which could have led to an underestimation of group  
448 differences or associations. Second, it leads to limited generalizability to populations with  
449 higher levels of social-affective responses and symptomatology. Third, social-affective  
450 responses were operationalized as dichotomous variables due to their low variance, leading to  
451 a loss of information compared to a dimensional measure. (2) We examined a male, military  
452 sample, which limits the generalizability of the findings. There is also a chance of  
453 underreporting of mental health problems in this sample (27) (3) There were no validated  
454 instruments available to assess all of the examined trauma-related social-affective responses.  
455 Despite careful theoretical considerations, the validity of the used items remains unclear. (4)  
456 This was a cross-sectional study, so no definite conclusions can be made about the temporal

## SOCIAL-AFFECTIVE RESPONSES TO TRAUMA EXPOSURE

457 sequence of the variables studied. Longitudinal studies are needed to investigate the  
458 relationship between trauma-related social-affective responses and subsequent  
459 psychopathology.

460         Despite these limitations, several important implications can be drawn from the  
461 findings of the present study. Our results indicate that trauma-related social alienation,  
462 shame, guilt, and revenge are likely phenomena in individuals who meet criteria for AUD,  
463 DD and PTSD as well as in individuals with higher levels of depressive and anxiety  
464 symptoms. This is important since previous research suggests that negative social-affective  
465 responses contribute to a higher severity and to the maintenance of psychopathology (10, 17).  
466 In addition, it has been demonstrated that trauma-related shame, guilt and alienation are  
467 associated with poorer outcomes in exposure based treatments (16, 42) and that within-person  
468 change in trauma-related shame and guilt predict changes in psychopathology during  
469 treatment (42). This underlines the importance of considering social-affective responses as  
470 possible treatment targets. More specifically, individuals experiencing negative social-  
471 affective responses could particularly benefit from cognitive interventions that challenge  
472 dysfunctional trauma interpretations (16, 43). Additionally, emotion-focused interventions  
473 aimed at promoting (self-)compassion represent a promising approach for individuals  
474 experiencing self-critical responses such as shame and guilt after trauma exposure (43). As  
475 these interventions also aim to enforce social connectedness, they might also be valuable for  
476 individuals experiencing social alienation. Moreover, individuals who feel socially alienated  
477 after trauma exposure could benefit from interpersonal skills training.

478         Our findings further suggest that it is important for both researchers and clinicians to  
479 keep in mind that the presence of self-critical responses to trauma exposure (e.g. shame,  
480 guilt) is often accompanied by hostile responses (e.g. revenge) and social alienation.  
481 Similarly, individuals who present primarily with hostile responses towards others could at

## SOCIAL-AFFECTIVE RESPONSES TO TRAUMA EXPOSURE

482 the same time have problems with reduced self-esteem (10) and may strongly experience  
483 shame and guilt. Therefore, it seems important to also assess those social-affective responses  
484 that may not be initially reported by patients, especially if these responses could be perceived  
485 as stigmatizing.

486 To further understand the potential causal pathways between trauma-related social-  
487 affective responses and subsequent psychopathology, future studies should investigate the  
488 relationship between social-affective responses and mental disorders in prospective  
489 longitudinal studies, ideally with multiple assessments shortly after trauma exposure.  
490 Upcoming studies should also examine the extent to which findings of the present study can  
491 be replicated in different samples, including different demographic groups (high-risk groups  
492 vs. general population), different gender groups, and groups with higher levels of  
493 psychopathology and negative social-affective responses.

### 494 **Acknowledgments**

495 The study was logistically supported by the staff of the “Centre for Psychiatry and  
496 Posttraumatic Stress” in Berlin. Sabine Schönfeld, Clemens Kirschbaum and Hans-Ulrich  
497 Wittchen contributed to the planning of the former study program. Beyond the co-authors  
498 (Sebastian Trautmann and Judith Schäfer), Christin Thureau, Michaela Galle, Kathleen Mark  
499 and Anke Schumann were involved in the logistical handling.

### 500 **References**

- 501 1. Dohrenwend BP. Adversity, stress, and psychopathology. Oxford: Oxford University  
502 Press; 1998.
- 503 2. Breslau N, Davis GC, Peterson EL, Schultz L. Psychiatric Sequelae of Posttraumatic  
504 Stress Disorder in Women. Archives of General Psychiatry. 1997;54(1):81-7.

## SOCIAL-AFFECTIVE RESPONSES TO TRAUMA EXPOSURE

- 505 3. Bonanno GA. Uses and abuses of the resilience construct: Loss, trauma, and health-  
506 related adversities. *Social Science and Medicine*. 2012;74(5):753-6.
- 507 4. Ozer EJ, Best SR, Lipsey TL, Weiss DS. Predictors of posttraumatic stress disorder  
508 and symptoms in adults: a meta-analysis. *Psychological Bulletin*. 2003;129(1):52.
- 509 5. Maercker A, Hecker T. Broadening perspectives on trauma and recovery: A socio-  
510 interpersonal view of PTSD. *European Journal of Psychotraumatology*. 2016;7(1):29303.
- 511 6. Maercker A, Horn AB. A socio-interpersonal perspective on PTSD: The case for  
512 environments and interpersonal processes. *Clinical Psychology & Psychotherapy*.  
513 2013;20(6):465-81.
- 514 7. Zeller M, Yuval K, Nitzan-Assayag Y, Bernstein A. Self-compassion in recovery  
515 following potentially traumatic stress: Longitudinal study of at-risk youth. *Journal of*  
516 *abnormal child psychology*. 2015;43:645-53.
- 517 8. DePrince AP, Zurbriggen EL, Chu AT, Smart L. Development of the trauma appraisal  
518 questionnaire. *Journal of Aggression, Maltreatment & Trauma*. 2010;19(3):275-99.
- 519 9. Kubany ES, Haynes SN, Abueg FR, Manke FP, Brennan JM, Stahura C.  
520 Development and validation of the trauma-related guilt inventory (TRGI). *Psychological*  
521 *Assessment*. 1996;8(4):428-44.
- 522 10. Gäbler I, Maercker A. Revenge phenomena and posttraumatic stress disorder in  
523 former East German political prisoners. *The Journal of Nervous and Mental Disease*.  
524 2011;199(5):287-94.
- 525 11. Foa EB, Ehlers A, Clark DM, Tolin DF, Orsillo SM. The Posttraumatic Cognitions  
526 Inventory (PTCI): Development and Validation. *Psychological Assessment*. 1999;11(3):303-  
527 14.
- 528 12. Ehlers A, Clark DM. A cognitive model of posttraumatic stress disorder. *Behaviour*  
529 *Research and Therapy*. 2000;38(4):319-45.



## SOCIAL-AFFECTIVE RESPONSES TO TRAUMA EXPOSURE

- 530 13. McDevitt-Murphy ME, Zakarian RJ, Olin CC. Assessment of emotion and emotion-  
531 related processes in PTSD. In: Tull MT, Kimbrel NA, editors. *Emotion in Posttraumatic*  
532 *Stress Disorder*. Academic Press; 2020. p. 3-41.
- 533 14. Tracy JL, Robins RW, Tangney JP. *The self-conscious emotions: Theory and*  
534 *research*. Guilford Press; 2007.
- 535 15. Lee DA, Scragg P, Turner S. The role of shame and guilt in traumatic events: A  
536 clinical model of shame-based and guilt-based PTSD. *British Journal of Medical Psychology*.  
537 2001;74(4):451-46.
- 538 16. Ehlers A, Clark DM, Dunmore E, Jaycox L, Meadows E, Foa EB. Predicting response  
539 to exposure treatment in PTSD: The role of mental defeat and alienation. *Journal of*  
540 *Traumatic Stress*. 1998;11(3):457-71.
- 541 17. Cunningham KC. Shame and guilt in PTSD. In: Tull MT, Kimbrel NA, editors.  
542 *Emotion in posttraumatic stress disorder*. Elsevier; 2020. p. 145-71.
- 543 18. Bannister JA, Colvonen PJ, Angkaw AC, Norman SB. Differential relationships of  
544 guilt and shame on posttraumatic stress disorder among veterans. *Psychological Trauma:*  
545 *Theory, research, practice, and policy*. 2019;11(1):35.
- 546 19. Shi C, Ren Z, Zhao C, Zhang T, Chan SHW. Shame, guilt, and posttraumatic stress  
547 symptoms: A three-level meta-analysis. *Journal of Anxiety Disorders*. 2021;82.
- 548 20. Mitchell R, Hanna D, Brennan K, Curran D, McDermott B, Ryan M, et al. Alienation  
549 appraisals mediate the relationships between childhood trauma and multiple markers of  
550 posttraumatic stress. *Journal of Child & Adolescent Trauma*. 2020;13(1):11-9.
- 551 21. Kunst M. PTSD symptom clusters, feelings of revenge, and perceptions of perpetrator  
552 punishment severity in victims of interpersonal violence. *International Journal of Law and*  
553 *Psychiatry*. 2011;34(5):362-7.

## SOCIAL-AFFECTIVE RESPONSES TO TRAUMA EXPOSURE

- 554 22. Aakvaag HF, Thoresen S, Wentzel-Larsen T, Dyb G, Røysamb E, Olf M. Broken and  
555 guilty since it happened: A population study of trauma-related shame and guilt after violence  
556 and sexual abuse. *Journal of Affective Disorders*. 2016;204:16-23.
- 557 23. Kubany ES, Abueg FR, Owens JA, Brennan JM, Kaplan AS, Watson SB. Initial  
558 examination of a multidimensional model of trauma-related guilt: Applications to combat  
559 veterans and battered women. *Journal of Psychopathology and Behavioral Assessment*.  
560 1995;14(4):353-76.
- 561 24. Tran HN, Lipinski AJ, Peter SC, Dodson TS, Majeed R, Savage UC, et al. The  
562 Association Between Posttraumatic Negative Self-Conscious Cognitions and Emotions and  
563 Maladaptive Behaviors: Does Time Since Trauma Exposure Matter? *Journal of Traumatic*  
564 *Stress*. 2019;32(2):249-59.
- 565 25. Wittchen HU, Schönfeld S, Thureau C, Trautmann S, Galle M, Mark K, et al.  
566 Prevalence, incidence and determinants of PTSD and other mental disorders: design and  
567 methods of the PID-PTSD+ 3 study. *International Journal of Methods in Psychiatric*  
568 *Research*. 2012;21(2):98-116.
- 569 26. Schönfeld S. Autobiographical memory changes in posttraumatic stress disorder  
570 (PTSD) (Doctoral dissertation): Philipps-Universität Marburg; 2006.
- 571 27. Johnson HP, Agius M. A Post-Traumatic Stress Disorder review: the prevalence of  
572 underreporting and the role of stigma in the Military. *Psychiatria Danubina*. 2018;30(suppl.  
573 7):508-10.
- 574 28. Kim S, Thibodeau R, Jorgensen RS. Shame, guilt, and depressive symptoms: a meta-  
575 analytic review. *Psychological Bulletin*. 2011;137(1):68.
- 576 29. Orth U, Montada L, Maercker A. Feelings of revenge, retaliation motive, and  
577 posttraumatic stress reactions in crime victims. *Journal of Interpersonal Violence*.  
578 2006;21(2):229-43.

## SOCIAL-AFFECTIVE RESPONSES TO TRAUMA EXPOSURE

- 579 30. McIlveen R, Curran D, Mitchell R, DePrince A, O'Donnell K, Hanna D. A  
580 meta-analytic review of the association between alienation appraisals and posttraumatic stress  
581 disorder symptoms in trauma-exposed adults. *Journal of Traumatic Stress*. 2020;33(5):720-  
582 30.
- 583 31. Wittchen HU, Pfister H. DIA-X-Interviews: Manual für Screening-Verfahren und  
584 Interview; Interviewheft Längsschnittuntersuchung (DIA-X-Lifetime); Ergänzungsheft (DIA-  
585 X-Lifetime); Interviewheft Querschnittuntersuchung (DIA-X-Monate); Ergänzungsheft  
586 (DIA-X-Monate); PC-Programm zur Durchführung des Interviews (Längs- und  
587 Querschnittuntersuchung); Auswertungsprogramm. Frankfurt: Swets and Zeitlinger; 1997.
- 588 32. Wittchen HU, Lachner G, Wunderlich U, Pfister H. Test-retest reliability of the  
589 computerized DSM-IV version of the Munich-Composite International Diagnostic Interview  
590 (M-CIDI). *Social Psychiatry and Psychiatric Epidemiology*. 1998;33(11):568-78.
- 591 33. Reed V, Gander F, Pfister H, Steiger A, Sonntag H, Trenkwalder C, et al. To what  
592 degree does the Composite International Diagnostic Interview (CIDI) correctly identify  
593 DSM-IV disorders? Testing validity issues in a clinical sample. *International Journal of*  
594 *Methods in Psychiatric Research*. 1998;7(3):142-55.
- 595 34. Conway CC, Forbes MK, South SC. A Hierarchical Taxonomy of Psychopathology  
596 (HiTOP) primer for mental health researchers. *Clinical Psychological Science*.  
597 2022;10(2):236-58.
- 598 35. Herrmann C, Buss U, Snaith RP. Hospital Anxiety and Depression Scale-German  
599 Version (HADS-D). Bern: Hans Huber; 1995.
- 600 36. StataCorp. Stata Statistical Software: Release 15. College Station: TX: StataCorp  
601 LLC 2017.

## SOCIAL-AFFECTIVE RESPONSES TO TRAUMA EXPOSURE

- 602 37. DePrince AP, Chu AT, Pineda AS. Links between specific posttrauma appraisals and  
603 three forms of trauma-related distress. *Psychological Trauma: Theory, Research, Practice,*  
604 *and Policy.* 2011;3(4):430-41.
- 605 38. American Psychiatric Association. *Diagnostic and Statistical Manual of Mental*  
606 *Disorders: DSM-IV-TR: 4th Edition Text Revision.* Washington, DC: American Psychiatric  
607 Association; 2000.
- 608 39. Horowitz MJ. Understanding and ameliorating revenge fantasies in psychotherapy.  
609 *American Journal of Psychiatry.* 2007;164(1):24-7.
- 610 40. Miethe S, Wigger J, Wartemann A, Trautmann S. Posttraumatic stress symptoms and  
611 its association with rumination, thought suppression and experiential avoidance: A systematic  
612 review and meta-analysis. *Journal of Psychopathology and Behavioral Assessment.* 2023.
- 613 41. Aldao A, Nolen-Hoeksema S, Schweizer S. Emotion-regulation strategies across  
614 psychopathology: A meta-analytic review. *Clinical Psychology Review.* 2010;30(2):217-37.
- 615 42. Øktedalen T, Hoffart A, Langkaas TF. Trauma-related shame and guilt as time-  
616 varying predictors of posttraumatic stress disorder symptoms during imagery exposure and  
617 imagery rescripting—A randomized controlled trial. *Psychotherapy Research.*  
618 2015;25(5):518-32.
- 619 43. Kümmerle S, Hammerstein S, Helmig EM, Müller-Engelmann M. K-METTA:  
620 Kognitive Techniken und Metta-Meditationen zur Reduktion traumabezogener Schuld-und  
621 Schamgefühle—Darstellung der Intervention anhand von zwei Fallbeispielen.  
622 *Verhaltenstherapie.* 2022;32(4):196-210.

623

### 624 **Supporting information captions**

625 **Table S1** *Comparison of participants included versus excluded due to missing data*

626 **Table S2** *Distribution of items measuring guilt, revenge, shame and social alienation*

medRxiv preprint doi: <https://doi.org/10.1101/2023.07.25.23293160>; this version posted July 27, 2023. The copyright holder for this preprint (which was not certified by peer review) is the author/funder, who has granted medRxiv a license to display the preprint in perpetuity. It is made available under a [CC-BY 4.0 International license](https://creativecommons.org/licenses/by/4.0/).

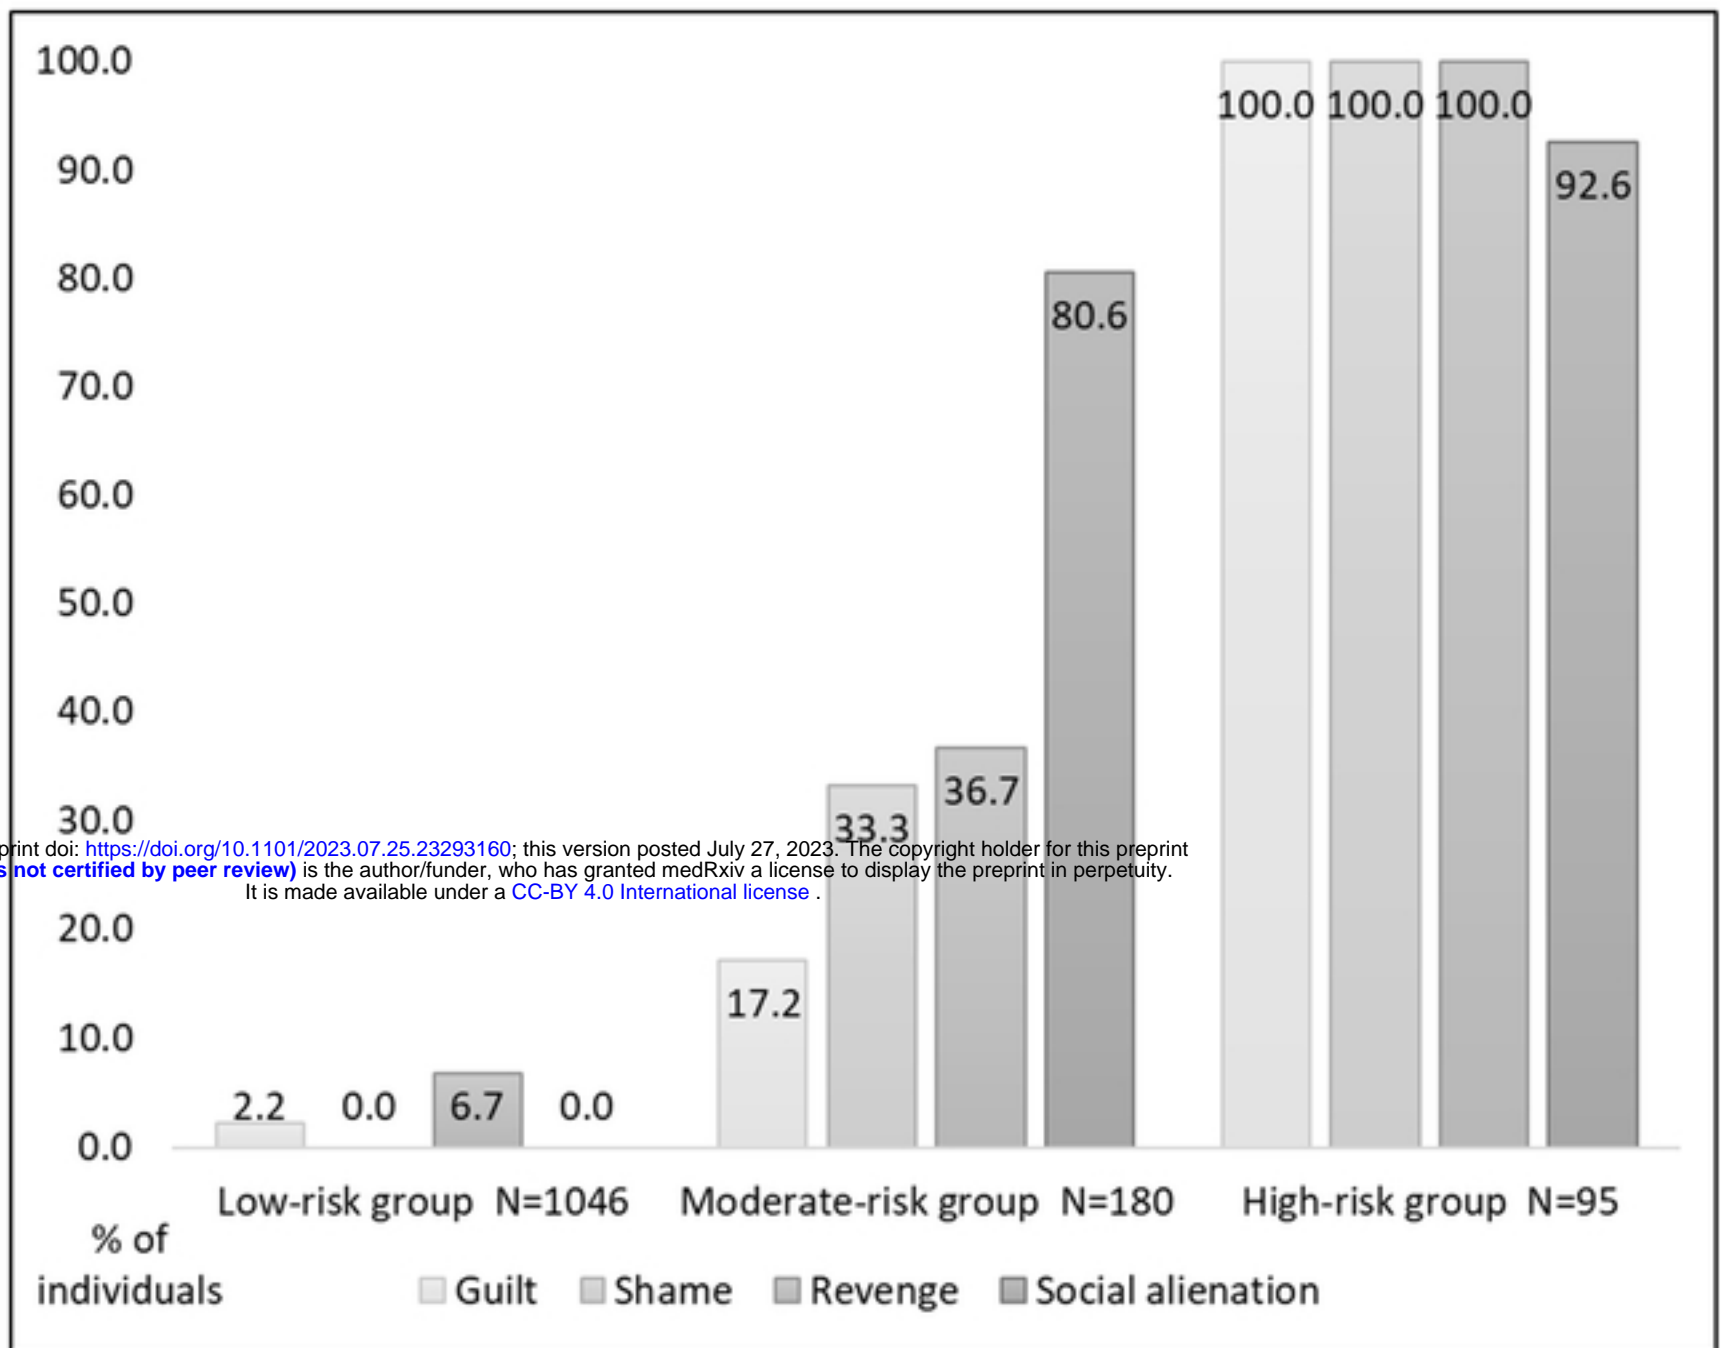

Figure 1
